# Supplementary material
Source: PubMed Central journal article supplement (PMC5019568)
Supplement: NIHMS782174-supplement-SI.pdf [file NIHMS782174-supplement-SI.pdf]

## SUPPLEMENTAL INFORMATION

### Enhancing Intracranial Delivery of Clinically Relevant Non-viral Gene Vectors

Sneha Berry<sup>a,b,#</sup>, Panagiotis Mastorakos<sup>a,c,#</sup>, Clark Zhang<sup>a,d</sup>, Eric Song<sup>a,b</sup>, Himat Patel<sup>a</sup>, Jung Soo Suk<sup>a,c,\*</sup>, Justin Hanes<sup>a,c,d,e,\*</sup>

<sup>a</sup> The Center for Nanomedicine at the Wilmer Eye Institute, Johns Hopkins University School of Medicine, Baltimore, MD, USA

<sup>b</sup> Center for Biotechnology Education, Krieger School of Arts and Sciences, Johns Hopkins University, Baltimore, MD, USA

<sup>c</sup> Department of Ophthalmology, Johns Hopkins University School of Medicine, Baltimore, MD, USA

<sup>d</sup> Department of Biomedical Engineering, Johns Hopkins University School of Medicine, Baltimore, MD, USA

<sup>e</sup> Department of Chemical & Biomolecular Engineering, Johns Hopkins University, Baltimore, MD, USA

#contributed equally

\*To whom correspondence should be addressed.

E-mail: Jung Soo Suk (jsuk@jhmi.edu) or Justin Hanes (hanes@jhmi.edu)

Telephone: J.S.S (+1 410 614 4526) or J.H. (+1 443 287 7921)

FAX: J.H. (+1 443 287 7922)

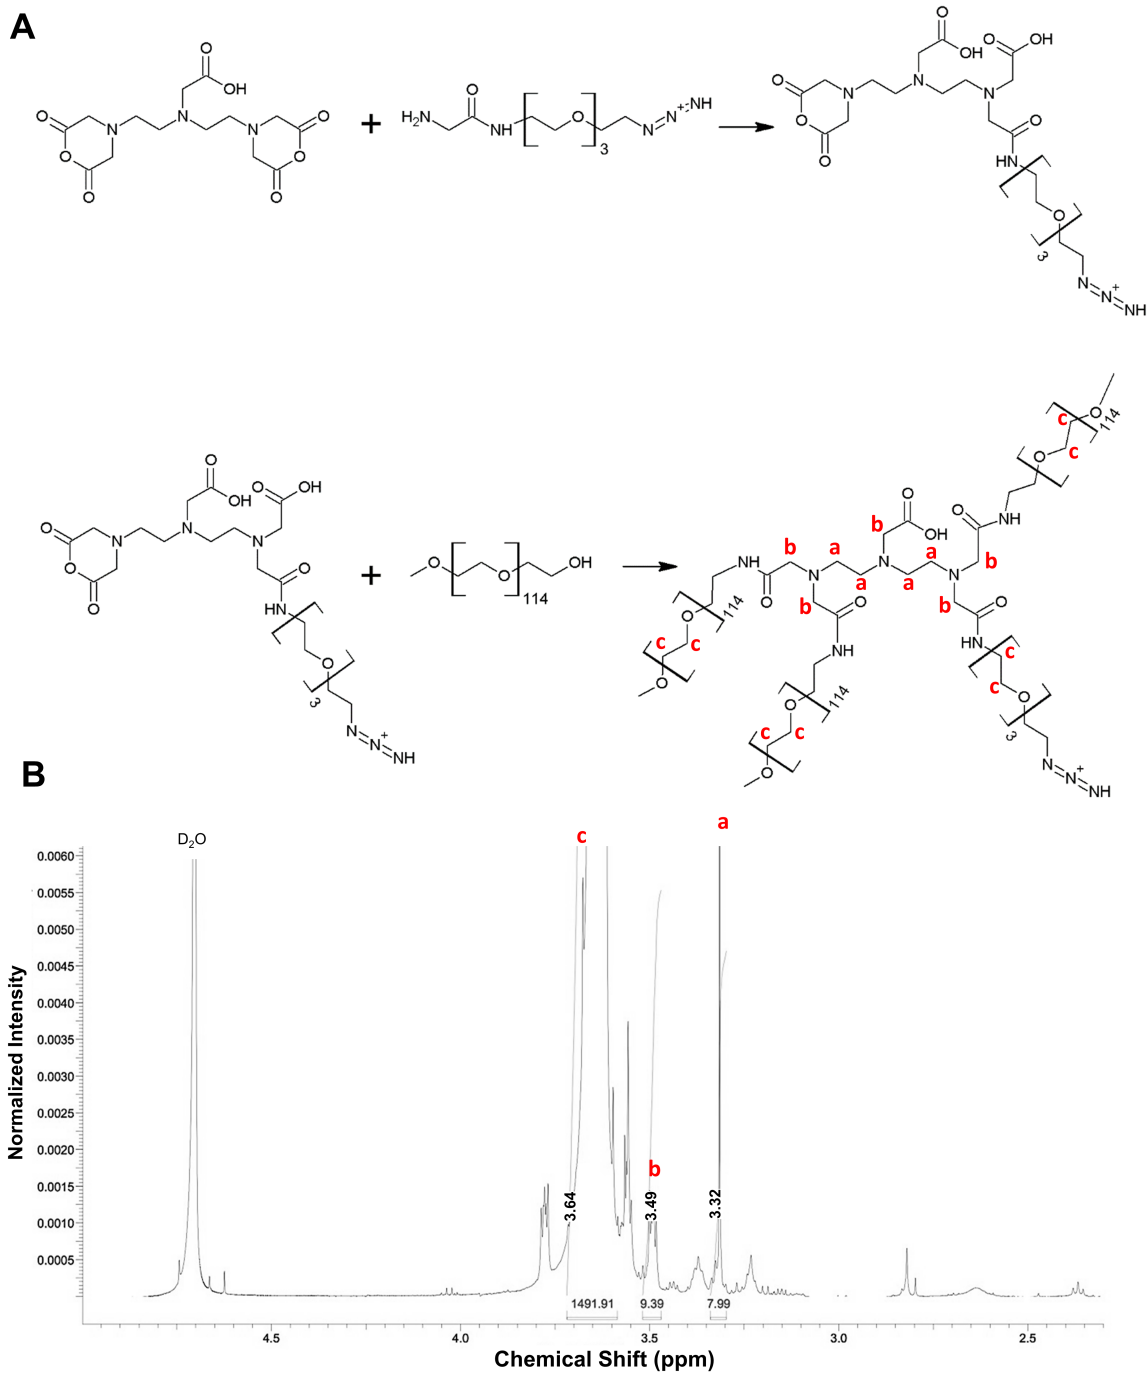

**Figure S1: Synthesis of BrPEG.** (A) Synthesis of azido-DTPA by reacting DTPA anhydride with 11-azido-3,6,9-trioxaundecanamine and subsequent PEGylation via amine-carboxyl coupling (B) <sup>1</sup>H-NMR spectra for BrPEG. Peaks a and b correspond to protons on DTPA and the peak c corresponds to PEG. Based on the NMR analysis, 3.27 5 kDa PEG chains on average are conjugated to each DTPA molecule.

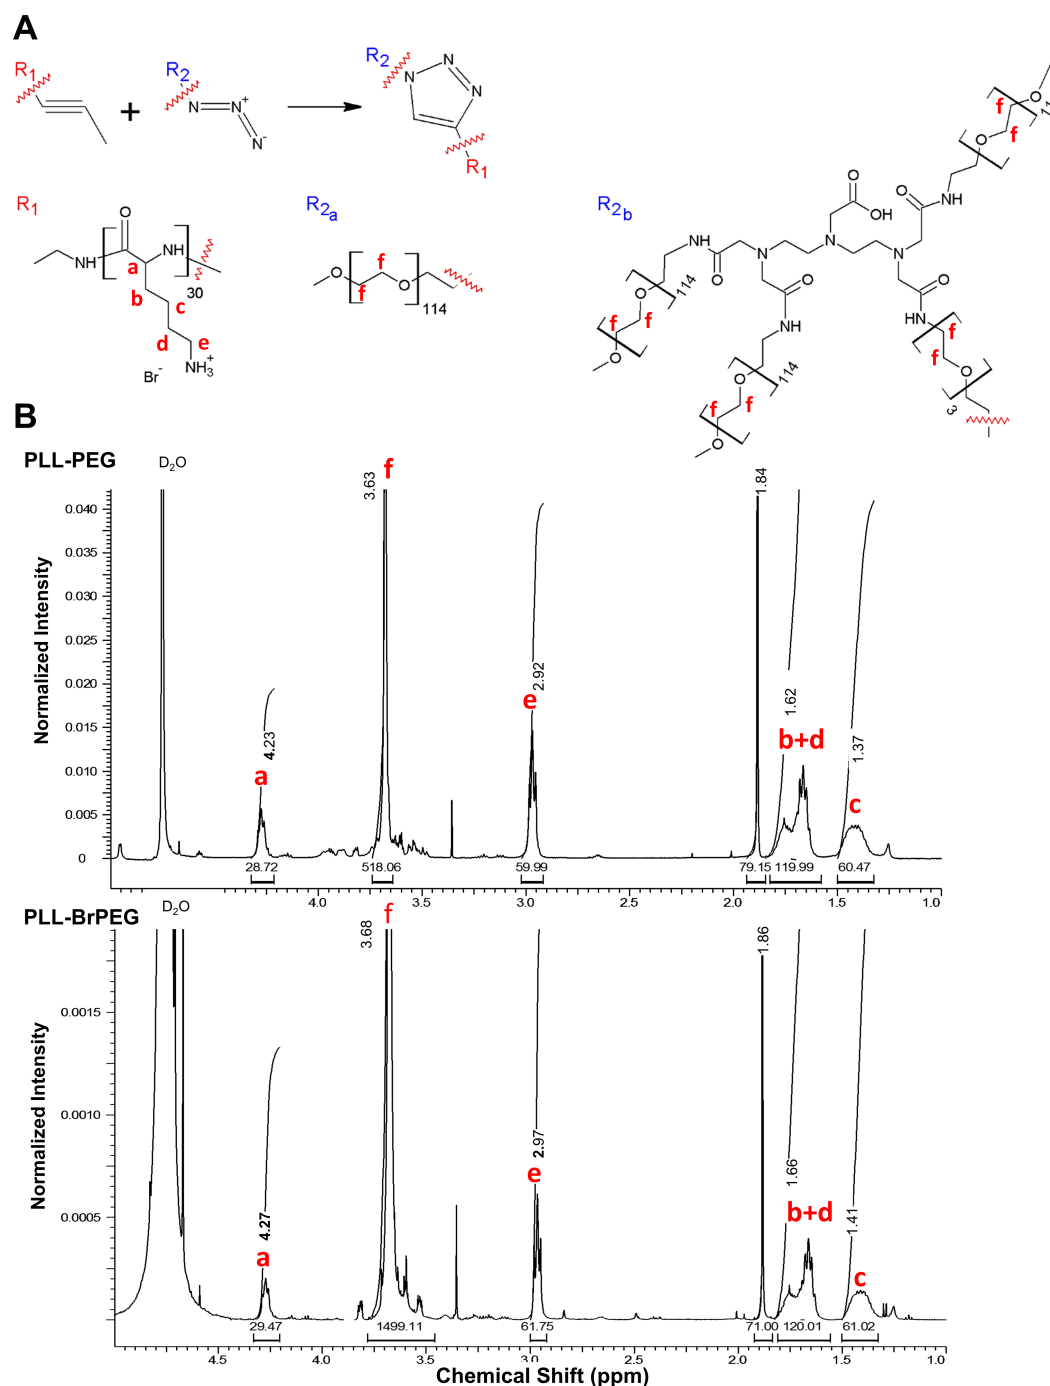

**Figure S2: Synthesis of PLL-PEG and PLL-BrPEG. (A)** Alkyne-azide cycloaddition click chemistry reaction for synthesis of PLL-PEG and PLL-BrPEG.  $R_1$  represents PLL and  $R_2$  represents linear 5 kDa PEG ( $R_{2a}$ ) or branched 15 kDa PEG ( $R_{2b}$ ) with chemical structures depicted below the reaction scheme. Red letters correspond to the NMR peaks of Fig. 1B **(B)**  $^1\text{H}$ -NMR spectra for end products of the PEGylation reactions purified by chromatography and dialysis. Peaks a, b+d, c and e correspond to protons on lysine residues as noted in Fig. 1A, peak f corresponds to PEG and peak g corresponds to acetate counter-ions. The degrees of PEGylation were determined by quantitative analysis of NMR spectrograms. The area under curves of PEG peaks were normalized by those of PLL peaks, yielding approximately 3 times higher PEG to PLL ratio for PLL-BrPEG compared to PLL-PEG.

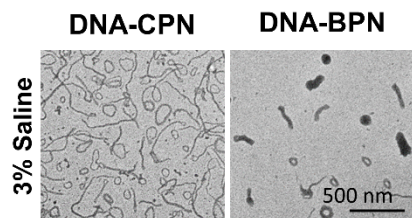

**Figure S3:** TEM images representative of DNA-CPN and DNA-BPN 1 hour post treatment with 3% saline; Scale bar: 500 nm.
